# Supplementary material for: Plastidial Phosphoglucomutase (pPGM) Overexpression Increases the Starch Content of Transgenic Sweet Potato Storage Roots
Source: MDPI journal article supplement (doi:10.3390/genes13122234), 2022-11-28
Supplement: s1 [file s1]

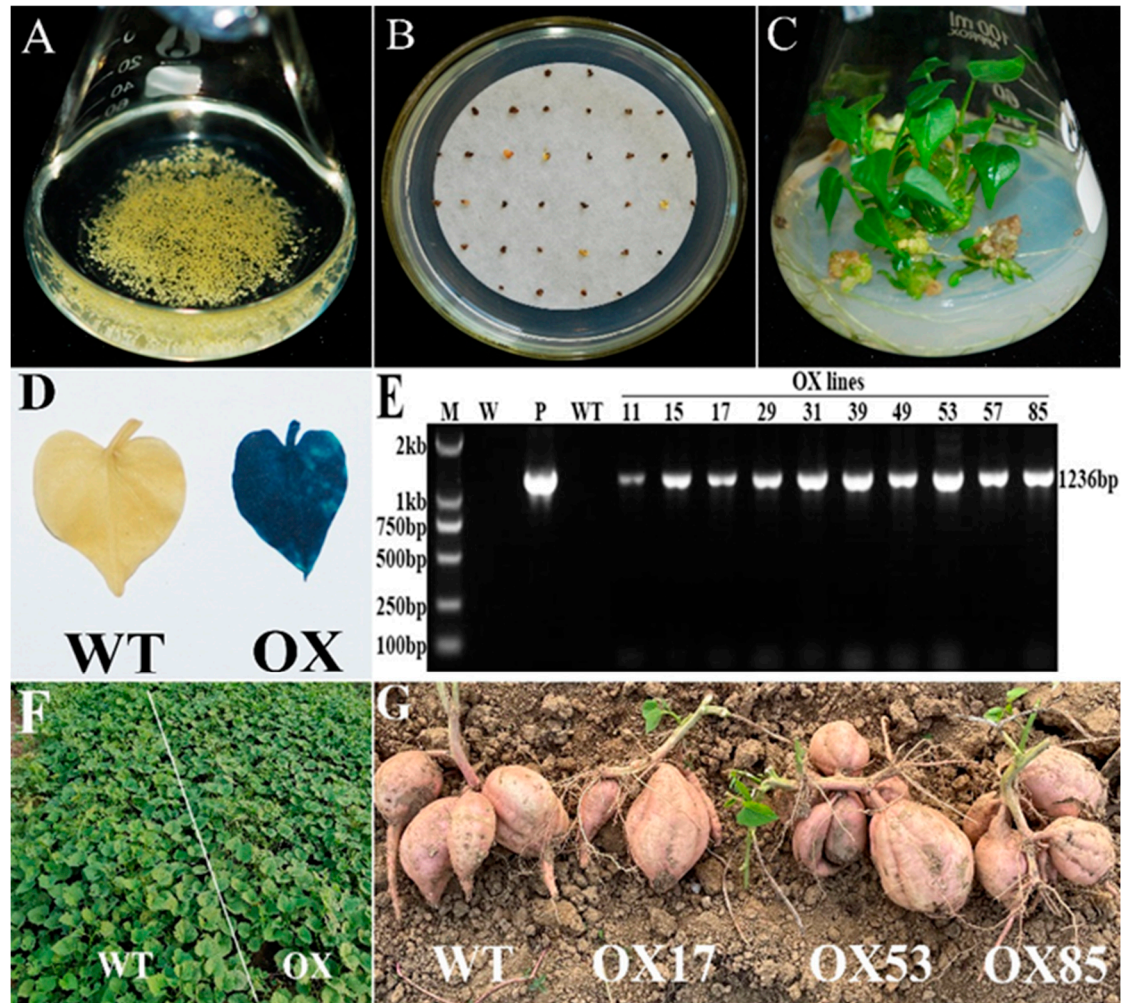

**Supplementary Figure S1.** Production of the transgenic sweet potato plants overexpressing the *IbpPGM* gene. (a) Proliferation of embryogenic suspension cultures of cultivar Lizixiang in MS medium containing  $2.0 \text{ mg L}^{-1}$  2,4-D. (b) Phosphinothricin (PPT)-resistant calluses (bright yellow) formed after 8 weeks of selection on MS medium containing  $2.0 \text{ mg L}^{-1}$  2,4-D,  $300 \text{ mg L}^{-1}$  cefotaxime sodium and  $50 \text{ mg L}^{-1}$  PPT. (c) Regeneration of plantlets from PPT-resistant calluses on MS medium containing  $1.0 \text{ mg L}^{-1}$  ABA and  $300 \text{ mg L}^{-1}$  cefotaxime sodium. (d) Positive and negative GUS staining of the leaves of OX and WT plants, respectively. (e) PCR analysis of GUS positive OX lines. Lane M: BL2000 DNA marker; Lane W: water as a negative control; Lane P: plasmid pC3301-121-IbpPGM as a positive control; Lane WT: WT as a negative control; Lanes 11-85: GUS positive OX lines. (f) WT and OX plants grown in the field. (g) Storage roots of the WT and OX plants.

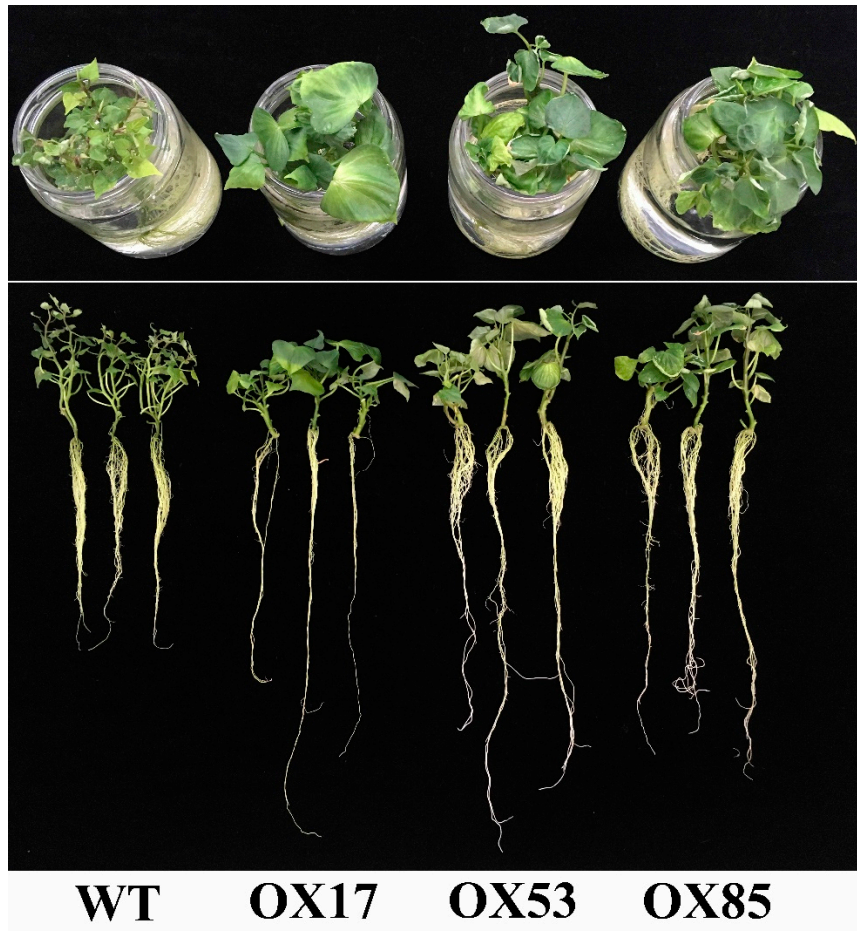

**Supplementary Figure S2.** Differences in leaf area and growth rate between the in-vitro plantlets of WT and OX lines.
